# Supplementary material
Source: HighWire-hosted journal article supplement (https://www.qdcxjkg.com/highwire/filestream/114384/field_highwire_adjunct_files/0/ERJ-01263-2012_Disclosures.pdf)
Supplement: ERJ-01263-2012_Disclosures.pdf [file ERJ-01263-2012_Disclosures.pdf]

**M.R. Pinsky** Hutchinson Medical awarded the author's department a \$30 000 grant to study tissue O<sub>2</sub> saturation changes during surgery. The study was never completed because follow-on funding was stopped by the company prior to starting data collection.
